# Supplementary material for: Inactivated Zoonotic Influenza A(H5N8) Vaccine Induces Humoral and Cell-mediated Immune Responses Against Highly Pathogenic Avian Influenza Clade 2.3.4.4b A(H5N1) Viruses
Source: Research Square preprint supplement (doi:10.21203/rs.3.rs-6804016/v1), 2025-06-12
Supplement: Supplementary file 1 [file 7b9ae44be954cafd8cedcdd7.pdf]

1    **EXTENDED DATA FIGURES & TABLES**

2

3    **Extended Data Table 1 | Characteristics of study participants**

|                                                   | Samples included in antibody analyses |                       | Samples included in analyses of T cells |                       |
|---------------------------------------------------|---------------------------------------|-----------------------|-----------------------------------------|-----------------------|
|                                                   | Previously unvaccinated               | Previously vaccinated | Previously unvaccinated                 | Previously vaccinated |
| <b>n</b>                                          | 30                                    | 9                     | 13                                      | 5                     |
| <b>Sex, n (%) female</b>                          | 24 (80%)                              | 8 (89%)               | 12 (92%)                                | 4 (80%)               |
| <b>Age (years), median (range)</b>                | 41 (27–63)                            | 51 (40–61)            | 35 (27–54)                              | 49 (40–51)            |
| <b>Target group</b>                               |                                       |                       |                                         |                       |
| Fur farm workers                                  | 0 (0%)                                | 0 (0%)                | 0 (0%)                                  | 0 (0%)                |
| Poultry farm workers                              | 3 (10%)                               | 0 (0%)                | 0 (0%)                                  | 0 (0%)                |
| Veterinarians                                     | 4 (13%)                               | 0 (0%)                | 1 (8%)                                  | 0 (0%)                |
| Bird ringers                                      | 5 (17%)                               | 0 (0%)                | 0 (0%)                                  | 0 (0%)                |
| Laboratory workers                                | 18 (60%)                              | 9 (100%)              | 12 (92%)                                | 5 (100%)              |
| <b>Dose interval (days), median (range)</b>       | 28 (20-53)                            | 28 (18-42)            | 28 (20-53)                              | 28 (18-35)            |
| <b>Number of previous H5 vaccine doses, n (%)</b> |                                       |                       |                                         |                       |
| 2                                                 | NA                                    | 4 (45%)               | NA                                      | 2 (40%)               |
| 4                                                 | NA                                    | 2 (22%)               | NA                                      | 1 (20%)               |
| 6                                                 | NA                                    | 3 (33%)               | NA                                      | 2 (40%)               |

4    NA= not applicable

5

6

7      **Extended Data Table 2 | Avian influenza vaccines administered in previously vaccinated participants.**

|                    | Pre-pandemic<br>A(H5N1),<br>inactivated,<br>AS03-adjuvanted<br>A/Indonesia/5/200<br>5-like split virion<br>vaccine,<br>clade 2.1.3.2<br>(GlaxoSmithKline)<br><b>2009</b> |                      | A(H5N1)<br>inactivated<br>adjuvant-free<br>A/Vietnam/1203/2<br>004-like whole<br>virus vaccine,<br>clade 1 (Baxter)<br><b>2011-2012</b> |                      | A(H5N1) inactivated<br>MF59-adjuvanted<br>A/turkey/Turkey/1/2<br>005 (H5N1)-like<br>strain (NIBRG-23)<br>vaccine,<br>clade 2.2.1<br>(Novartis)<br><b>2018</b> |                      | Zoonotic A(H5N8),<br>inactivated, M59-<br>adjuvanted,<br>A/Astrakhan/3212/2<br>020-like strain (CBER-<br>RG8A) vaccine,<br>(clade 2.3.4.4b)<br>(Seqirus Vaccines)<br><b>2024</b> |                      |
|--------------------|--------------------------------------------------------------------------------------------------------------------------------------------------------------------------|----------------------|-----------------------------------------------------------------------------------------------------------------------------------------|----------------------|---------------------------------------------------------------------------------------------------------------------------------------------------------------|----------------------|----------------------------------------------------------------------------------------------------------------------------------------------------------------------------------|----------------------|
| <b>Participant</b> | 1 <sup>st</sup> dose                                                                                                                                                     | 2 <sup>nd</sup> dose | 1 <sup>st</sup> dose                                                                                                                    | 2 <sup>nd</sup> dose | 1 <sup>st</sup> dose                                                                                                                                          | 2 <sup>nd</sup> dose | 1 <sup>st</sup> dose                                                                                                                                                             | 2 <sup>nd</sup> dose |
| 1                  |                                                                                                                                                                          |                      |                                                                                                                                         |                      | •                                                                                                                                                             | •                    | •                                                                                                                                                                                | •                    |
| 2                  |                                                                                                                                                                          |                      |                                                                                                                                         |                      | •                                                                                                                                                             | •                    | •                                                                                                                                                                                | •                    |
| 3                  | •                                                                                                                                                                        | •                    | •                                                                                                                                       | •                    |                                                                                                                                                               |                      | •                                                                                                                                                                                | •                    |
| 4                  | •                                                                                                                                                                        | •                    | •                                                                                                                                       | •                    | •                                                                                                                                                             | •                    | •                                                                                                                                                                                | •                    |
| 5                  | •                                                                                                                                                                        | •                    | •                                                                                                                                       | •                    | •                                                                                                                                                             | •                    | •                                                                                                                                                                                | •                    |
| 6                  | •                                                                                                                                                                        | •                    | •                                                                                                                                       | •                    | •                                                                                                                                                             | •                    | •                                                                                                                                                                                | •                    |
| 7                  |                                                                                                                                                                          |                      |                                                                                                                                         |                      | •                                                                                                                                                             | •                    | •                                                                                                                                                                                | •                    |
| 8                  | •                                                                                                                                                                        | •                    |                                                                                                                                         |                      | •                                                                                                                                                             | •                    | •                                                                                                                                                                                | •                    |
| 9                  |                                                                                                                                                                          |                      |                                                                                                                                         |                      | •                                                                                                                                                             | •                    | •                                                                                                                                                                                | •                    |

8      Detailed information and the number of A(H5) vaccine doses given prior to and during this study indicated  
9      by year for each participant. Vaccination is indicated by a solid circle (•).

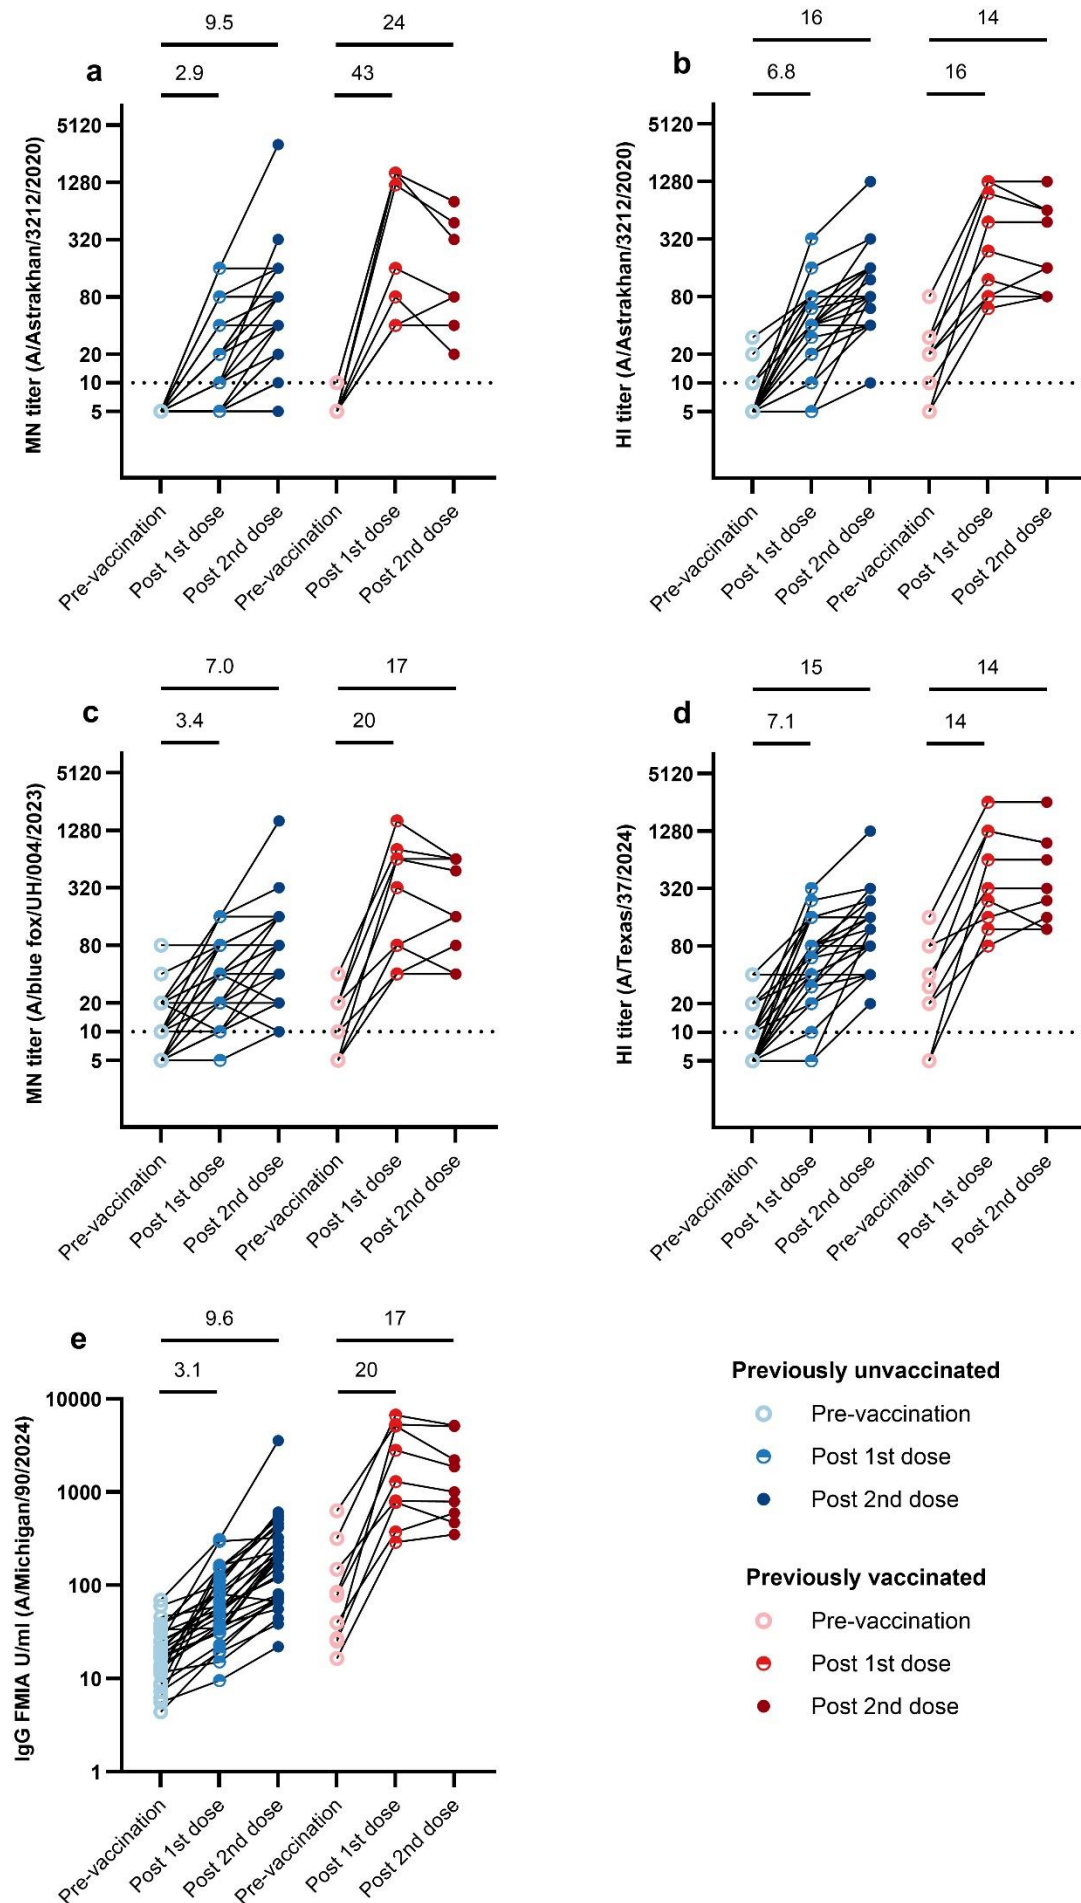

**Extended Data Fig. 1 | Kinetics of vaccine-induced individual antibody responses.** a, b, Antibodies targeting the vaccine antigen A(H5N8) A/Astrakhan/3212/2020 were measured using the microneutralization (MN) and the hemagglutination inhibition (HI) assay. c, Antibodies targeting A(H5N1) A/blue fox/UH/004/2023 were measured by the MN assay. d, Antibodies targeting A(H5N1) A/Texas/37/2024 were measured by HI assay. e, IgG antibodies binding to purified A(H5N1) A/Michigan/90/2024 H5 type HA antigen were measured by fluorescent bead-based multiplex immunoassay (FMIA). Individual responses are shown as lines for two groups, A(H5N1) unvaccinated (n=30) and previously vaccinated (n=9), at three time points: pre-vaccination, and three weeks after the first dose and the second dose. The dashed line indicates the positivity threshold. Fold changes in the mean antibody titers before vaccination and after the first dose, as well as before vaccination and after the second dose, represented by lines within the graphs are shown.

24 **Extended Data Table 3 | Viruses and antigens used in the microneutralization (MN) assay, the hemagglutination inhibition (HI) assay, and the fluorescent**  
 25 **bead-based multiplex immunoassay (FMIA).**

| Virus or antigen name      | GISAID isolate ID             | HA accession number     | Subtype | HA clade  | Full virus or RG or HA | Passage history | Origin of the virus or HA                                   | Biosafety level handling | Method |
|----------------------------|-------------------------------|-------------------------|---------|-----------|------------------------|-----------------|-------------------------------------------------------------|--------------------------|--------|
| A/Astrakhan/321 2/2020 CVV | EPI_ISL_13655139              | EPI2084527              | A(H5N8) | 2.3.4.4.b | IDCDC-RG71A            | E1M2            | The Crick Worldwide Influenza Centre, London (Ex/E1)        | BSL2+                    | MN     |
| A/Astrakhan/321 2/2020     | EPI_ISL_1038924               | EPI1846961              | A(H5N8) | 2.3.4.4.b | 7+1 PR/8 HY            | 293TM2          | Gene synthesis from Proteogenix                             | BSL2                     | HI     |
| A/blue fox/UH/004/2023     | EPI_ISL_18764855 (E1 passage) | EPI2914899 (E1 passage) | A(H5N1) | 2.3.4.4.b | Full virus             | M2              | Associate Professor Tarja Sironen, University of Helsinki   | BSL3                     | MN     |
| A/Texas/37/2024            | EPI_ISL_19027114              | EPI3171488              | A(H5N1) | 2.3.4.4.b | 7+1 PR/8 HY            | 293TM2          | Plasmid from Dr. Daniel R. Perez, University of Georgia, US | BSL2                     | HI     |
| A/Michigan/90/2 024        | EPI_ISL_19162802              | EPI3334182              | A(H5N1) | 2.3.4.4.b | HA amino acids 1-530   | Original        | Antigen from Native Antigen Company                         | BSL1                     | FMIA   |

26 CVV = candidate vaccine virus, HA = hemagglutinin, RG = reverse genetics, PR/8 HY = A/Puerto Rico/8/1934 high yield, M = MDCK.

27

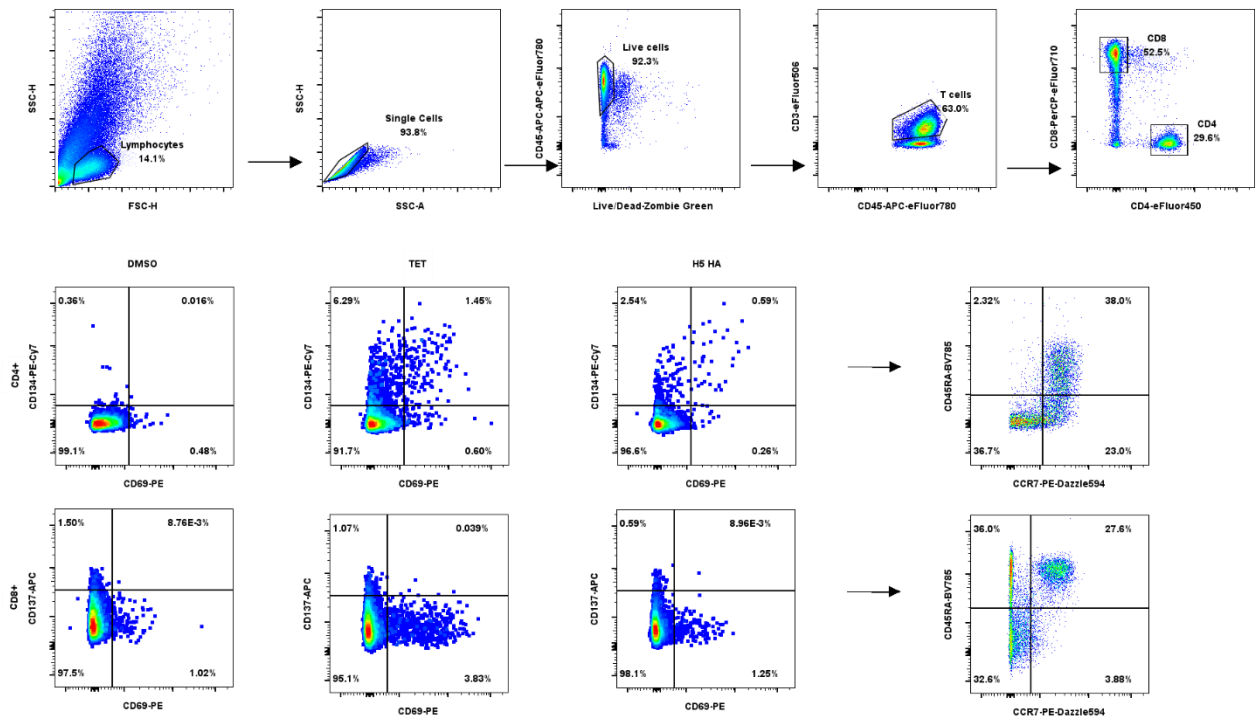

28

29 **Extended Data Fig. 2 | Gating strategy for differentiating blood cell populations after flow cytometry.**

30 Representative gating strategy for CD4<sup>+</sup> and CD8<sup>+</sup> T cells after peptide pool stimulation. DMSO, tetanus

31 toxoid (TET) and H5 HA peptide pool stimulated cells are shown as representatives.

32

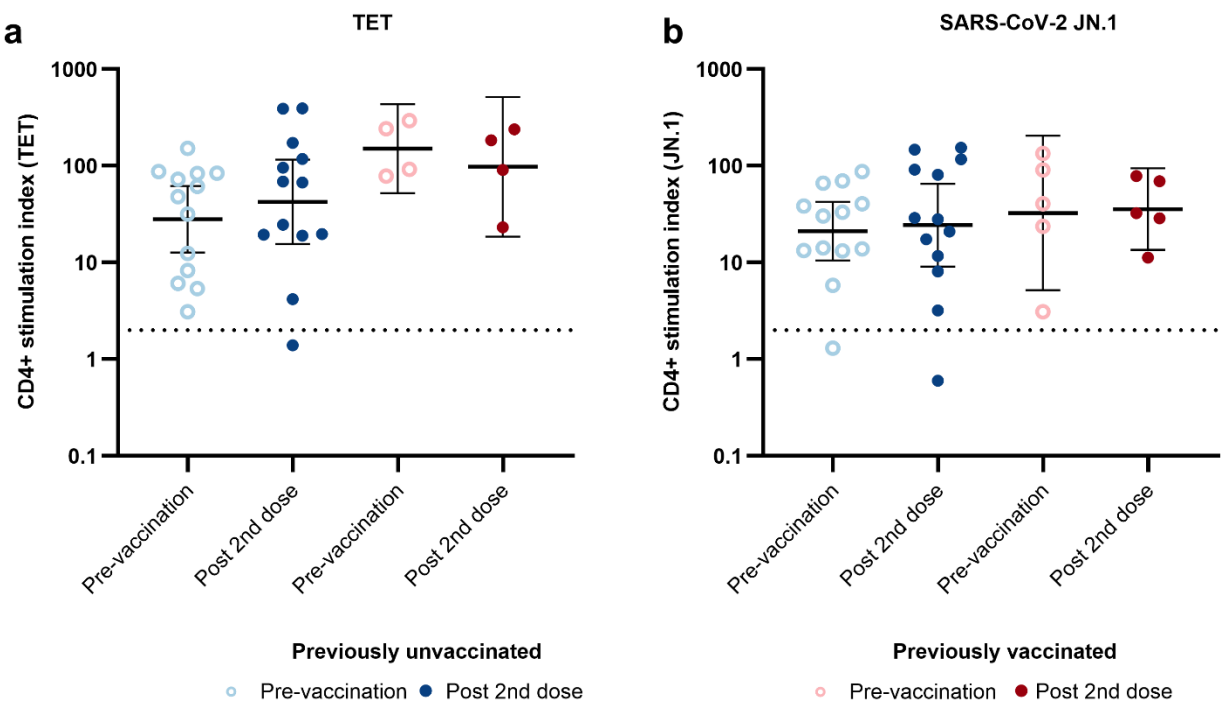

34

35 **Extended Data Fig. 3 | CD4<sup>+</sup> and CD8<sup>+</sup>T-cell responses specific to TET and SARS-CoV-2 JN.1.** a, Stimulation  
36 index fold increases of CD4<sup>+</sup>/CD69<sup>+</sup>/CD134<sup>+</sup> populations in relation to DMSO. b, Stimulation index fold  
37 increases of CD8<sup>+</sup>/CD69<sup>+</sup>/CD134<sup>+</sup> populations in relation to DMSO. Blue dots indicate individuals with no  
38 previous avian influenza vaccinations, and red dots indicate individuals with previous avian influenza  
39 vaccinations. The graphs display geometric mean indices (lines) and 95% confidence intervals (whiskers).  
40 Dashed line indicates the cut-off threshold. Statistical significance was determined with Wilcoxon matched-  
41 pairs signed rank test. Two-tailed  $p < 0.05$  is considered a significant difference.

42

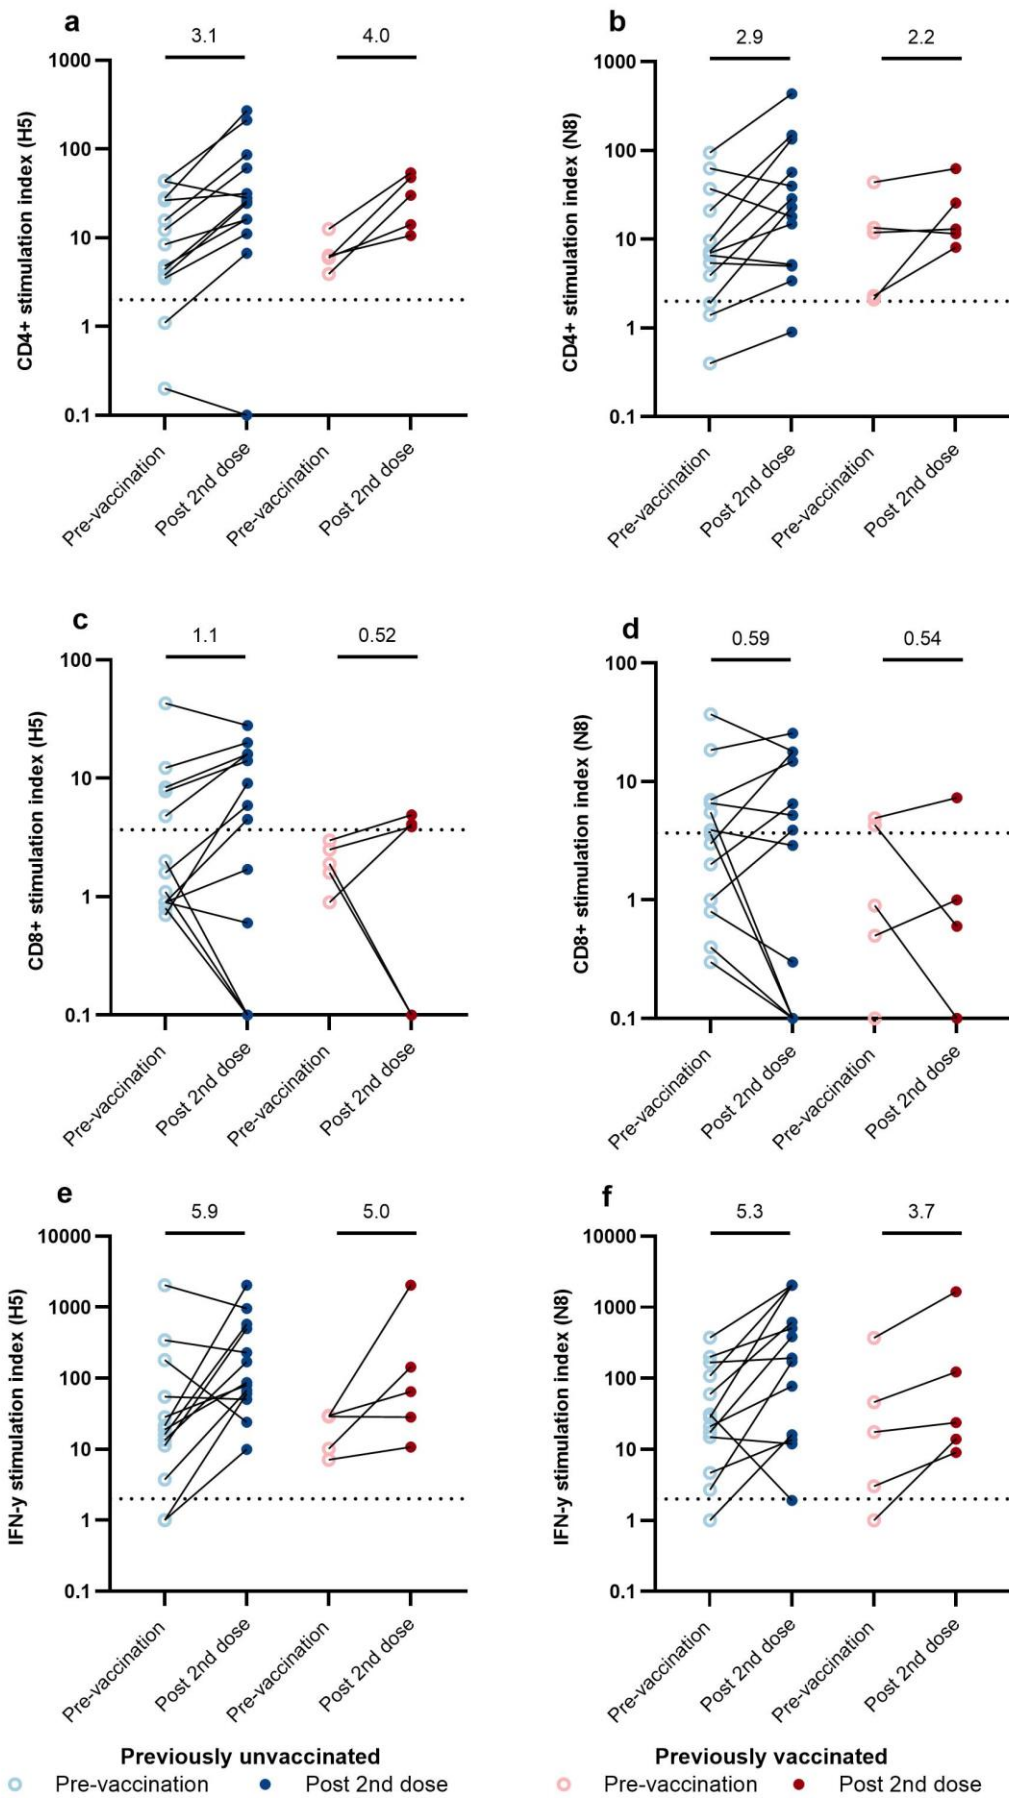



**Extended Data Fig. 4 | Kinetics of individual cell-mediated immune responses.** a, Activation induced marked based CD4<sup>+</sup>/CD69<sup>+</sup>/CD134<sup>+</sup> T-cell responses specific to H5 peptide pool stimulation. b, CD4<sup>+</sup>/CD69<sup>+</sup>/CD134<sup>+</sup> T-cell responses specific to N8 peptide pool stimulation. c, CD8<sup>+</sup>/CD69<sup>+</sup>/CD134<sup>+</sup> T-cell responses specific to H5 peptide stimulation. d, CD8<sup>+</sup>/CD69<sup>+</sup>/CD134<sup>+</sup> cell responses specific to N8 peptide stimulation. Stimulation indices of secreted IFN-γ from PBMC supernatants after stimulation with e, H5 and f, N8 peptide pools. Individual responses are shown as lines for two groups, A(H5N1) unvaccinated (n=13) and previously vaccinated (n=5), at two time points: pre-vaccination, and three weeks after the second dose. The dashed line indicates the positivity threshold, which was SI 2. The mean fold changes between the samples before vaccination and after the second dose as shown as number on top of the lines.

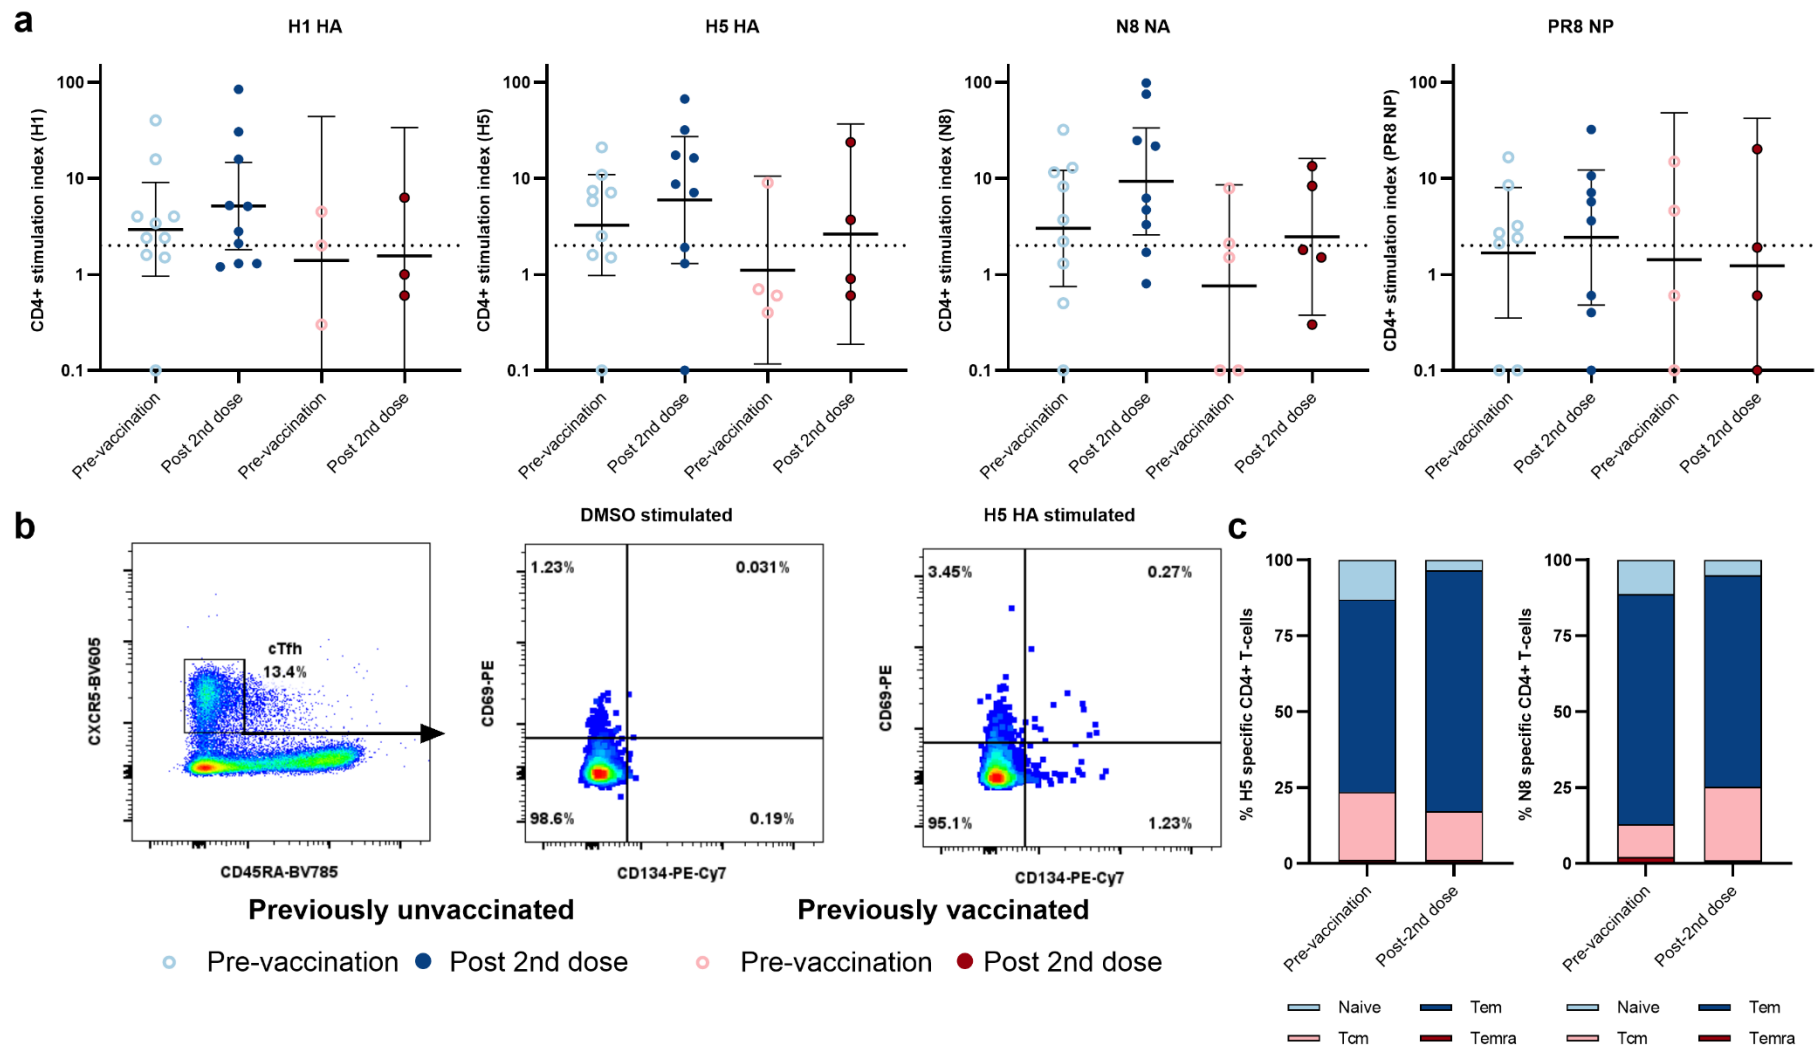

54

55 **Extended Data Fig. 5 | Activation induced marker analysis of cTfh responses to influenza peptide stimulation, and distribution of influenza antigen-**  
 56 **specific CD4<sup>+</sup> T cells to naïve, Tem, Tcm, and Temra subclasses. a, Gating strategy for identifying CD4<sup>+</sup>/CXCR5<sup>+</sup>/CD45RA<sup>-</sup>/CD69<sup>+</sup>/CD134<sup>+</sup> follicular T helper cell**

57 (cTfh) populations. b, Stimulation indices of H1, H5, N8 and NP peptide pool stimulated CD4<sup>+</sup>/CXCR5<sup>+</sup>/CD45RA<sup>-</sup>/CD69<sup>+</sup>/CD134<sup>+</sup> T cell populations in relation to  
58 DMSO stimulated cells. c, H5-specific CD4<sup>+</sup> T cells and N8-specific CD4<sup>+</sup> T cells, displayed as percentages of average respective populations.

59

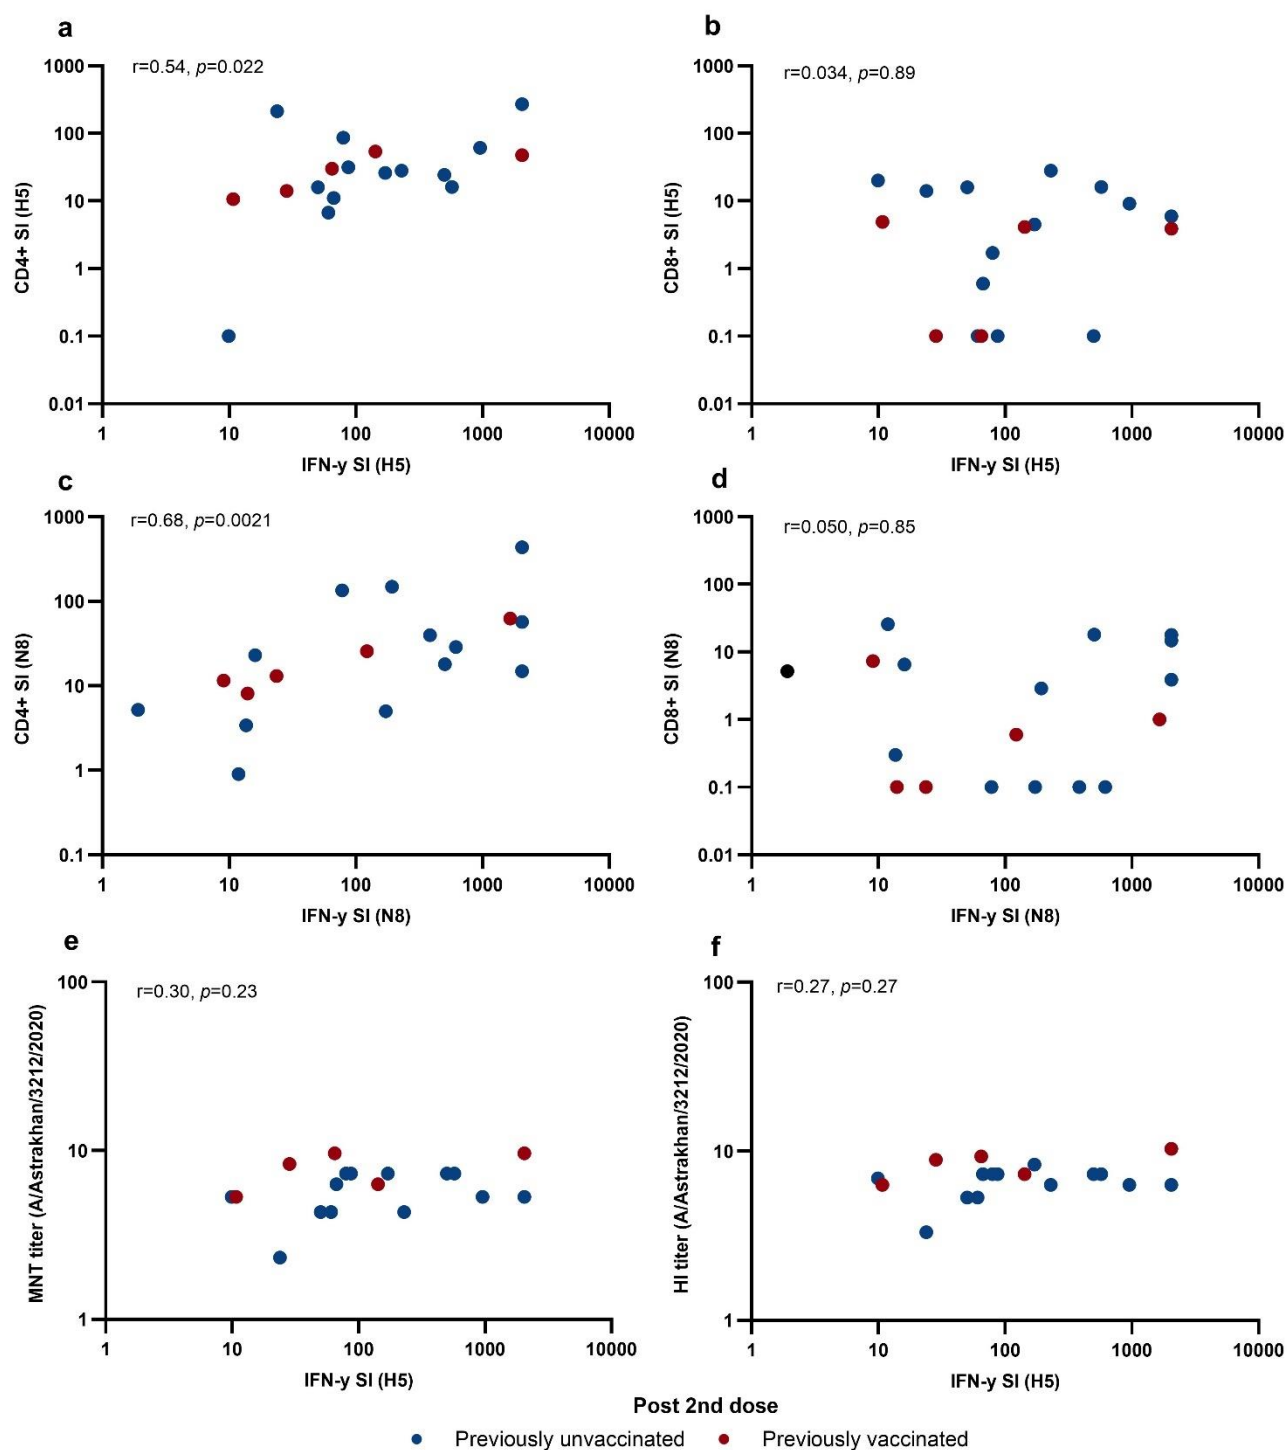

60

61 **Extended Data Figure 6 | Correlation between IFN- $\gamma$  secretion and CD4<sup>+</sup>/CD8<sup>+</sup> T-cell responses and**  
 62 **antibody titers.** Spearman correlation was used to assess the relationship between SI of CD4<sup>+</sup> and CD8<sup>+</sup> T  
 63 cells and IFN- $\gamma$  SI in response to H5 and N8 peptide pool stimulation. a, CD4<sup>+</sup> SI (H5) correlated positively  
 64 with IFN- $\gamma$  SI (H5), b, CD8<sup>+</sup> SI (H5) did not show a significant correlation with IFN- $\gamma$  SI (H5), c, CD4<sup>+</sup> SI (N8)  
 65 showed a strong positive correlation with IFN- $\gamma$  SI (N8), d, CD8<sup>+</sup> SI (N8) showed no correlation with IFN- $\gamma$  SI  
 66 (N8). Correlations between IFN- $\gamma$  SI (H5 peptide pool stimulated) and antibody titers against  
 67 A/Astrakhan/3212/202 H5N8 virus were also assessed e, microneutralization (MN) titer, and f,

68 hemagglutination inhibition (HI) titer, neither of which showed significant correlations. Correlation  
69 coefficients ( $r$ ) and corresponding  $p$  values ( $p$ ) are reported in the figure panels.  
70

71 **Extended Data Table 4 | Fluorochrome-antibody panel used in the flow cytometry**

| Antibody                                | Fluorochrome         | Manufacturer                 | Cat#       |
|-----------------------------------------|----------------------|------------------------------|------------|
| Anti-human CD45 (HI30 clone)            | APC-eFluor780        | Invitrogen/Life technologies | 47-0459-42 |
| Anti-human CD3 (UCHT1 clone)            | eFluor506            | Invitrogen/Life technologies | 69-0038-42 |
| Anti-human CD4 (RPA-T4 clone)           | eFluor450            | Invitrogen/Life technologies | 48-0049-42 |
| Anti-human CD8a (SK1)                   | PerCP-eFluor710      | Invitrogen/Life technologies | 46-0087-42 |
| Anti-human CD69 (FN50 clone)            | PE                   | BD Biosciences               | 555531     |
| Anti-human CD134 (ACT35 clone)          | PE/Cyanine7          | BioLegend                    | 350012     |
| Anti-human CD137 (4B4-1 clone)          | APC                  | BioLegend                    | 309810     |
| Anti-human CD45RA (HI100 clone)         | Brilliant Violet 785 | BioLegend                    | 304140     |
| Anti-human CD197 (CCR7) (G043H7 clone)  | PE/Dazzle 594        | BioLegend                    | 353236     |
| Anti-human CD185 (CXCR5) (J252D4 clone) | Brilliant Violet 605 | BioLegend                    | 356930     |
